# Supplementary material for: The Capability of high spatial-temporal remote sensing imagery for monitoring surface morphology of lake ice in Chagan Lake of Northeast China
Source: Copernicus journal article supplement (doi:10.5194/tc-2022-175), 2022-09-20
Supplement: Supplementary file 1 [file tc-2022-175-supplement.pdf]

# 1 Supplemental materials

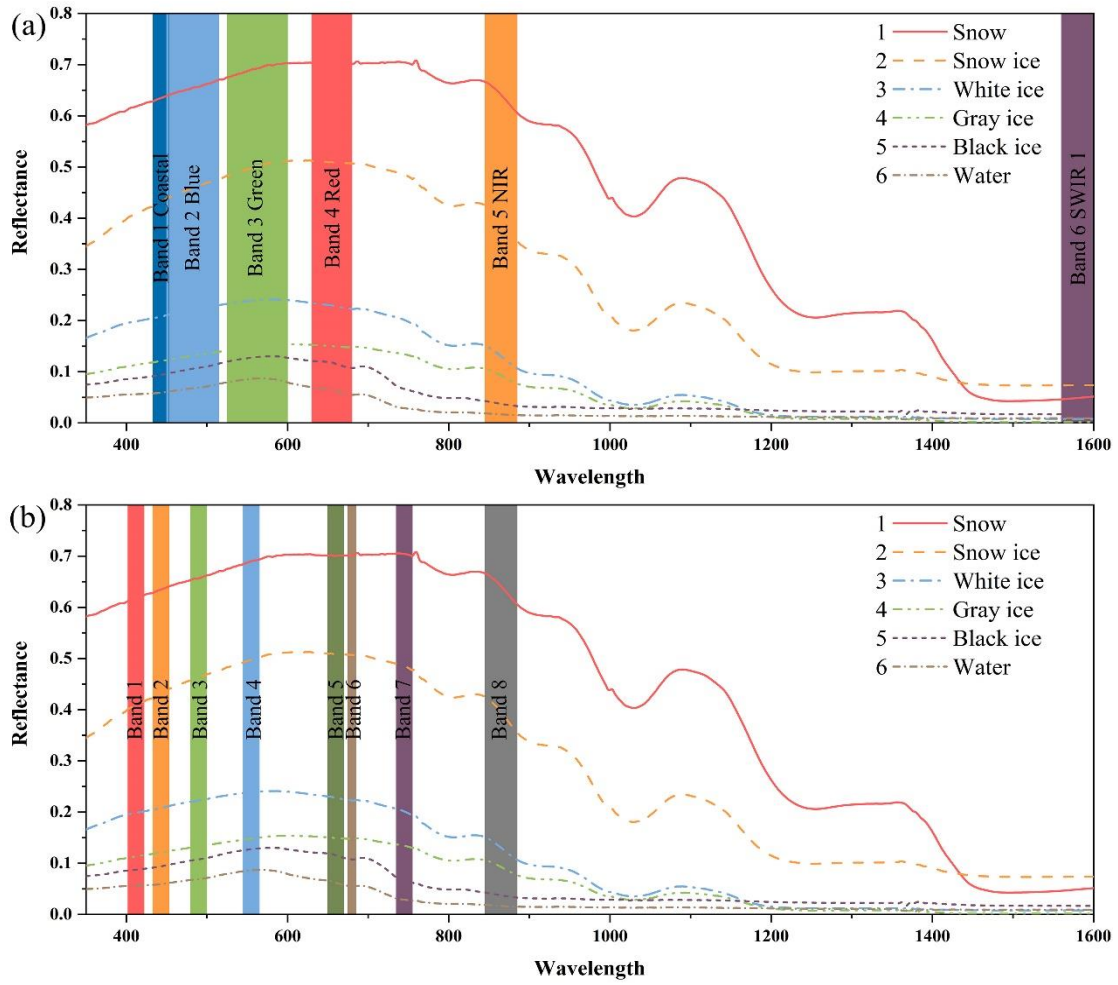

2

3 Figure S1 The band information of Landsat (a) and GOCI (b).

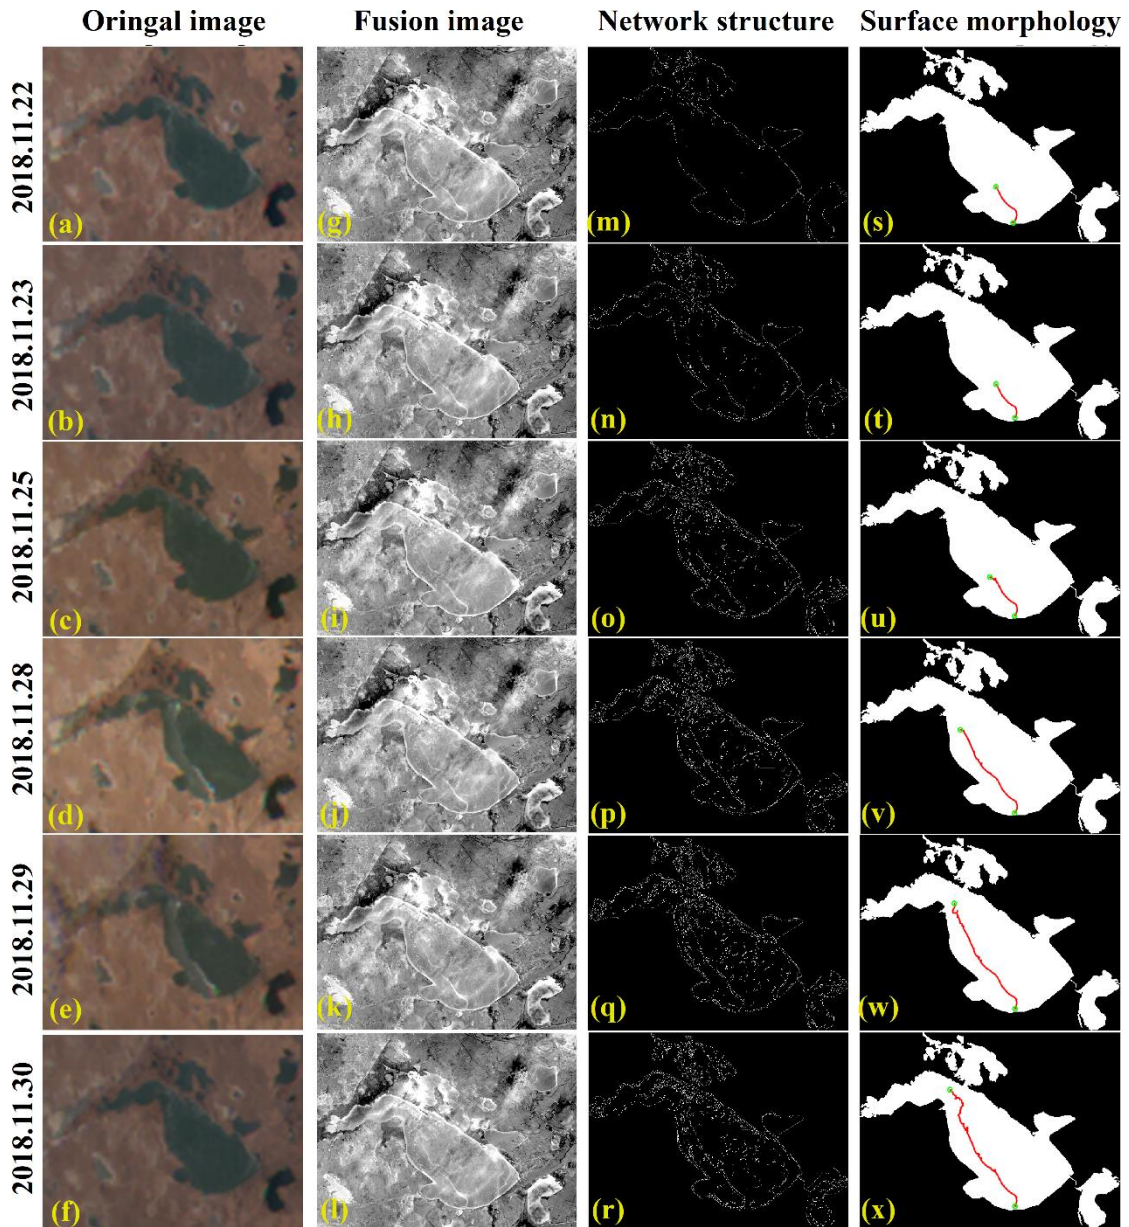

4

5 Figure S2 The changes of ice ridges during the freeze-up process from November 22 to November  
6 30, 2019: (a-f) the original images from GOCI; (g-l) the fusion images from Landsat and GOCI;  
7 (m-r) the network structure of surface morphology; (s-x) the surface morphology.

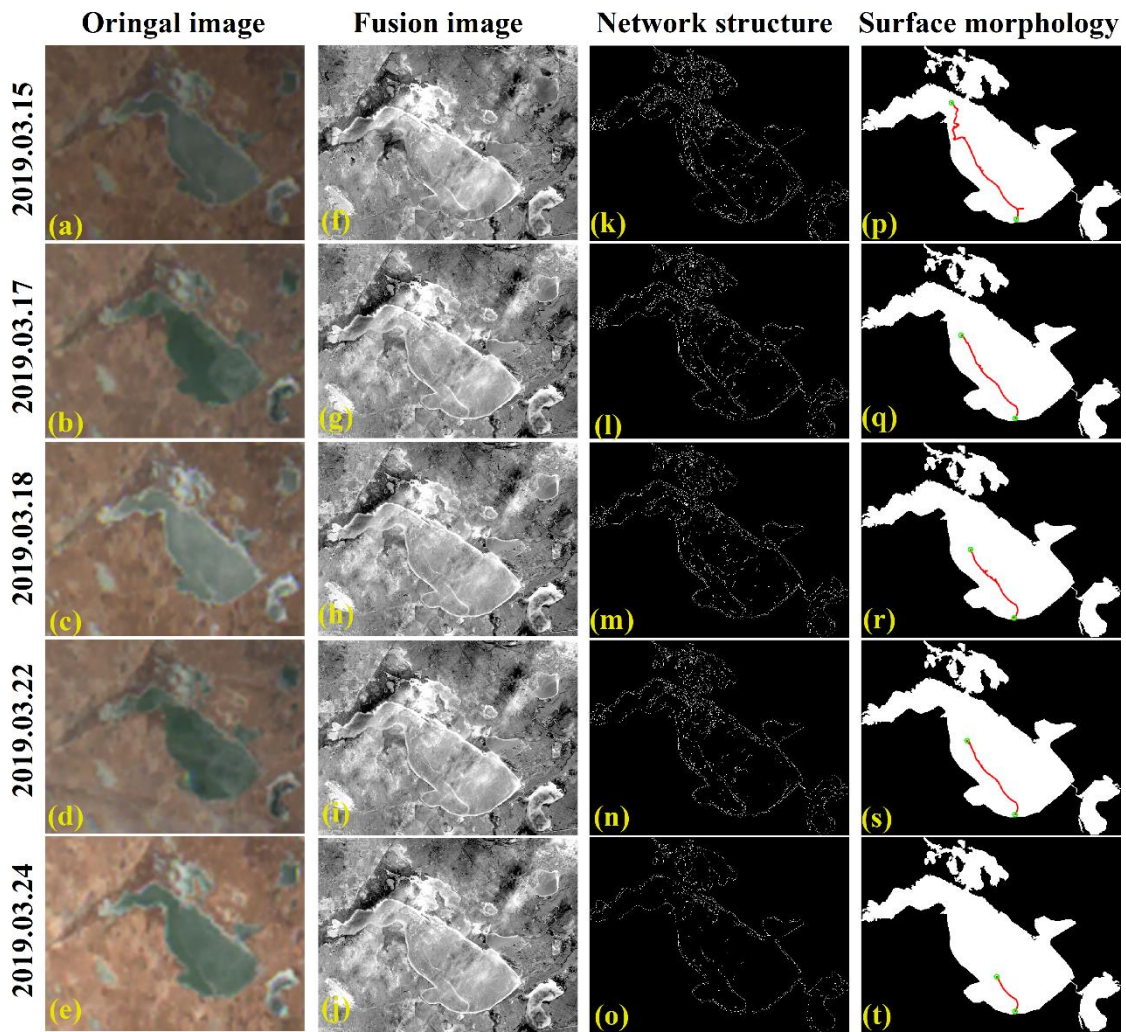

8

9 Figure S3 The changes of ice ridges during the break-up process from March 15 to March 24, 2019:  
 10 (a-e) the original images from GOCI; (f-j) the fusion images from Landsat and GOCI; (k-o) the  
 11 network structure of surface morphology; (p-t) the surface morphology.

12 Table S1 The freeze-up and break-up dates of Chagan Lake based on MODIS LST products for  
 13 eight cold seasons from 2010 to 2021. The freeze-up date, break-up date, and ice cover duration are  
 14 represented by FUD, BUD, and ICD.

| Cold season | FUD               | BUD               | ICD (day)  |
|-------------|-------------------|-------------------|------------|
| 2010        | 2009/11/10        | 2010/04/16        | 157        |
| 2011        | 2010/11/18        | 2011/03/31        | 133        |
| 2012        | 2011/11/02        | 2012/04/07        | 157        |
| 2013        | 2012/11/10        | 2013/04/16        | 157        |
| 2014        | 2013/11/17        | 2014/03/22        | 126        |
| 2015        | 2014/11/17        | 2015/04/07        | 142        |
| 2016        | 2015/11/09        | 2016/03/19        | 131        |
| 2017        | 2016/10/31        | 2017/03/30        | 151        |
| 2018        | 2017/11/17        | 2018/04/18        | 153        |
| 2019        | <b>2018/11/17</b> | <b>2019/03/22</b> | <b>126</b> |
| 2020        | 2019/11/17        | 2020/03/29        | 134        |
| 2021        | 2020/11/16        | 2021/03/30        | 135        |
| Means       | 11/12             | 04/03             | 141.83     |

15
